# Supplementary material for: RETRACTED: Silencing of Kv1.5 Gene Inhibits Proliferation and Induces Apoptosis of Osteosarcoma Cells
Source: MDPI journal article supplement (doi:10.3390/ijms161126002), 2015-11-11
Supplement: s1 [file s1]

# Supplementary Materials: Silencing of *Kv1.5* Gene Inhibits Proliferation and Induces Apoptosis of Osteosarcoma Cells

Jin Wu, Zhida Chen, Qingjun Liu, Wenrong Zeng, Xinyu Wu and Bin Lin

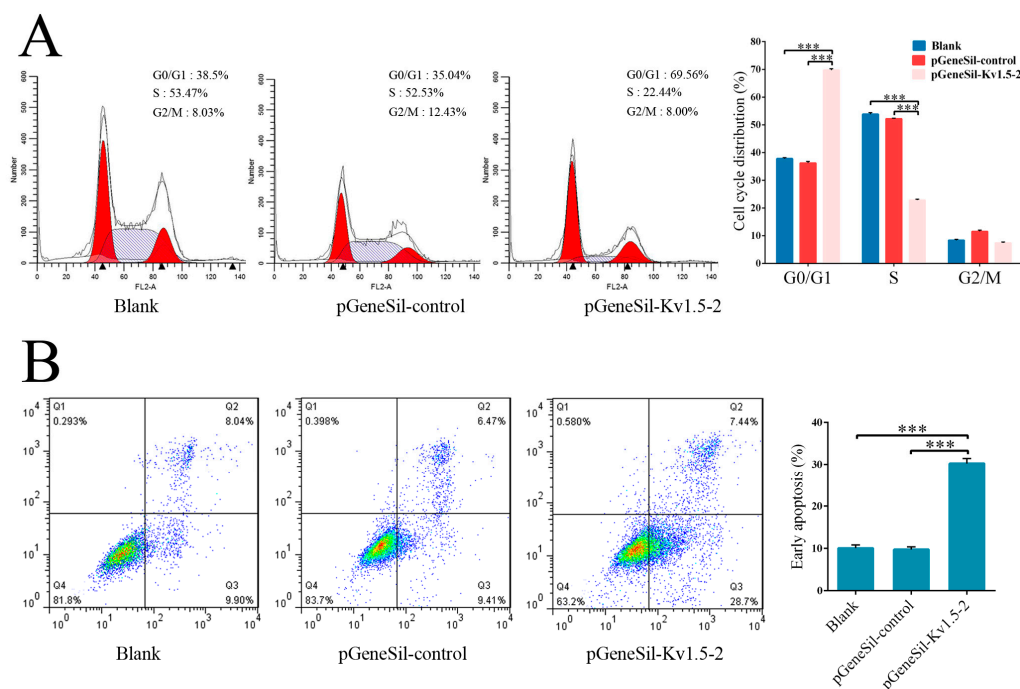

**Figure S1.** The effects of *Kv1.5* knockdown on cell cycle and apoptosis of osteosarcoma Saos-2 cells. **(A)** Saos-2 cells were transfected with control-shRNA, or *Kv1.5*-shRNA, or left untreated. *Kv1.5* knockdown induced a significant increase in cells arrested in the G0/G1 phase and a decrease in cells arrested in the S phase; **(B)** Saos-2 cells were transfected with *Kv1.5*-shRNA and then analyzed by flow cytometry. Cells untreated or transfected with control-shRNA served as controls. Cells in the right lower quadrant were annexin-positive, indicating early apoptotic cells ( $n = 3$ ). \*\*\*  $p < 0.001$ .

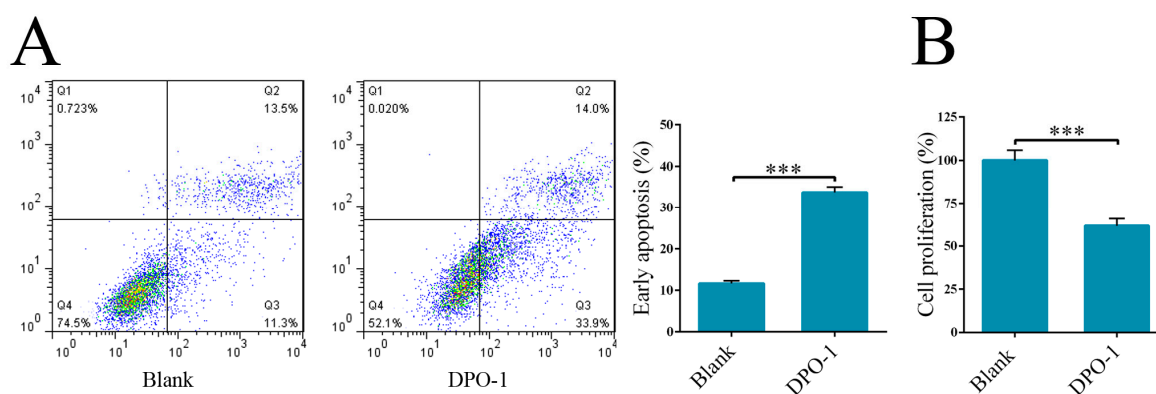

**Figure S2.** The effects of *Kv1.5* specific inhibitor DPO-1 on the proliferation and apoptosis of MG-63 cells. MG-63 cells were treated with vehicle (blank) or DPO-1 (30 nM). **(A)** DPO-1 induced the apoptosis of MG-63 cells. Cells in the right lower quadrant were annexin-positive, indicating early apoptotic cells; **(B)** DPO-1 inhibited the proliferation of MG-63 cells.  $n = 3$ . \*\*\*  $p < 0.001$ .
